# Supplementary material
Source: PubMed Central journal article supplement (PMC4135996)
Supplement: AAC.02396-14_zac008143114so1.pdf [file AAC.02396-14_zac008143114so1.pdf]

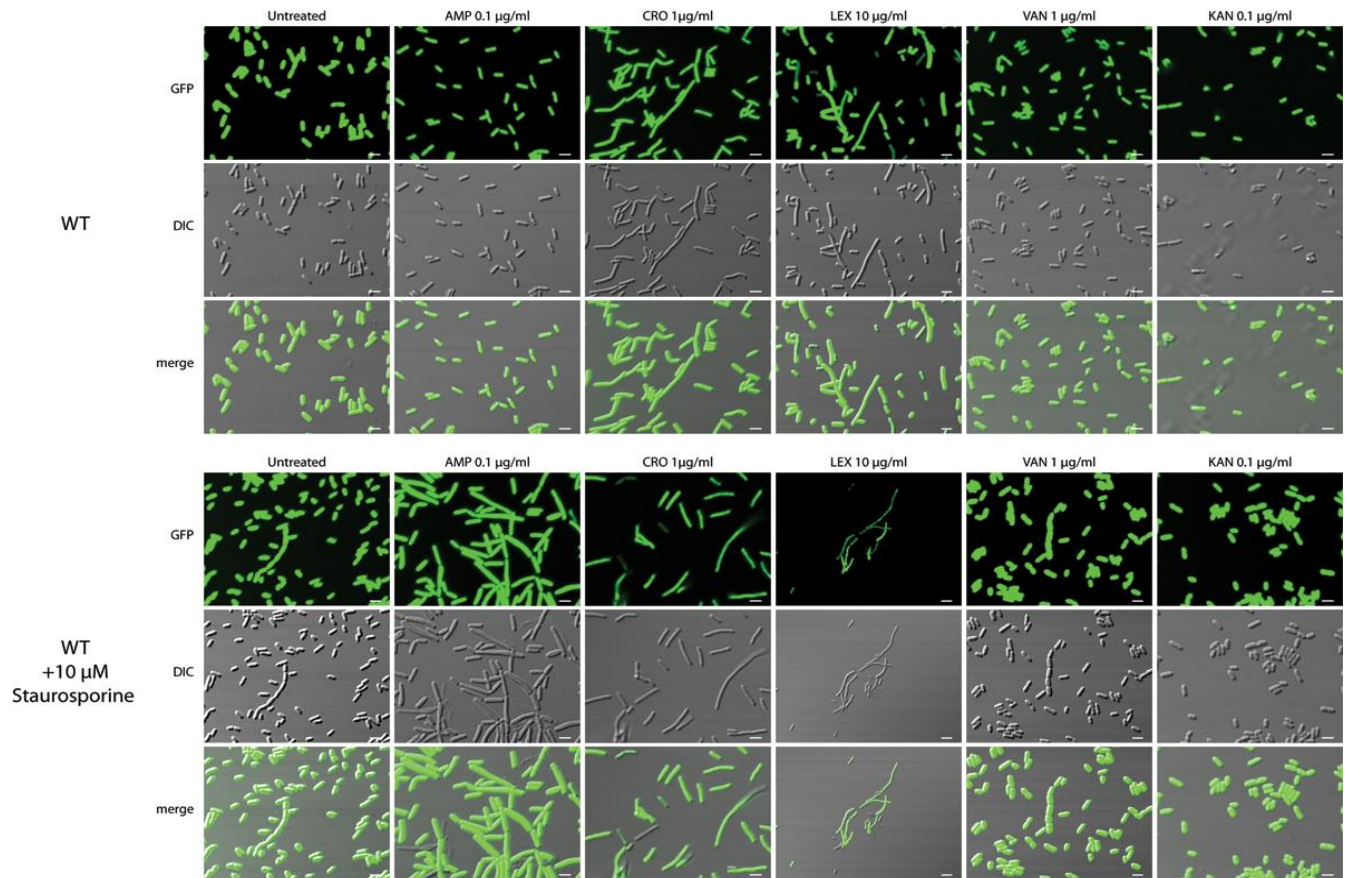

**Figure S1 – Staurosporine treatment in combination with  $\beta$ -lactam antibiotics leads to chaining and septation defects**

Overnight cultures of wild type *L. monocytogenes* were back diluted and grown for 6 hours with the indicated concentration of antibiotic either in the absence (top panel) or presence (bottom panel) of 10  $\mu$ M Staurosporine. Data are representative of at least 3 independent repeats.

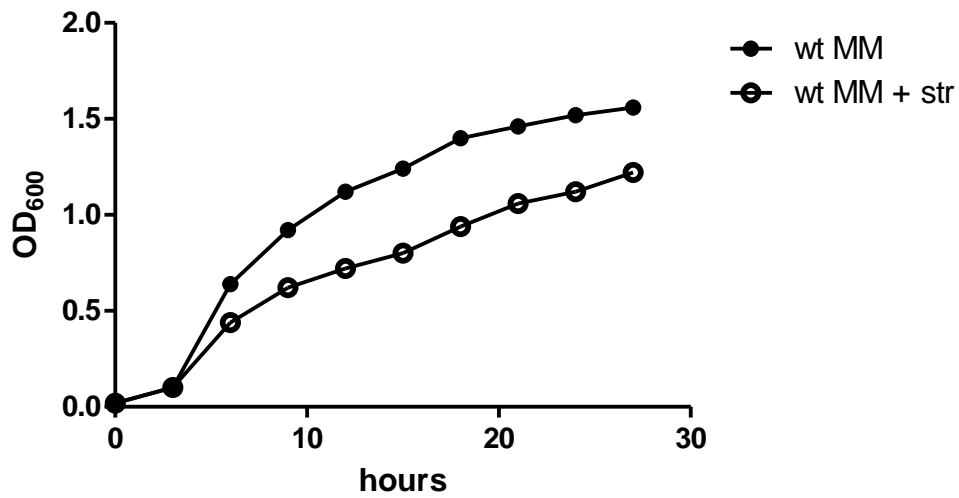

**Figure S2. Staurosporine treatment inhibits *L. monocytogenes* growth in minimal media.**

Overnight cultures of wild type *L. monocytogenes* were washed and back diluted 1:100 into minimal media with glucose as the primary carbon source. Growth was analyzed for 27 hours at 3 hour intervals at 37°C shaking. Data are representative of at least 3 independent repeats

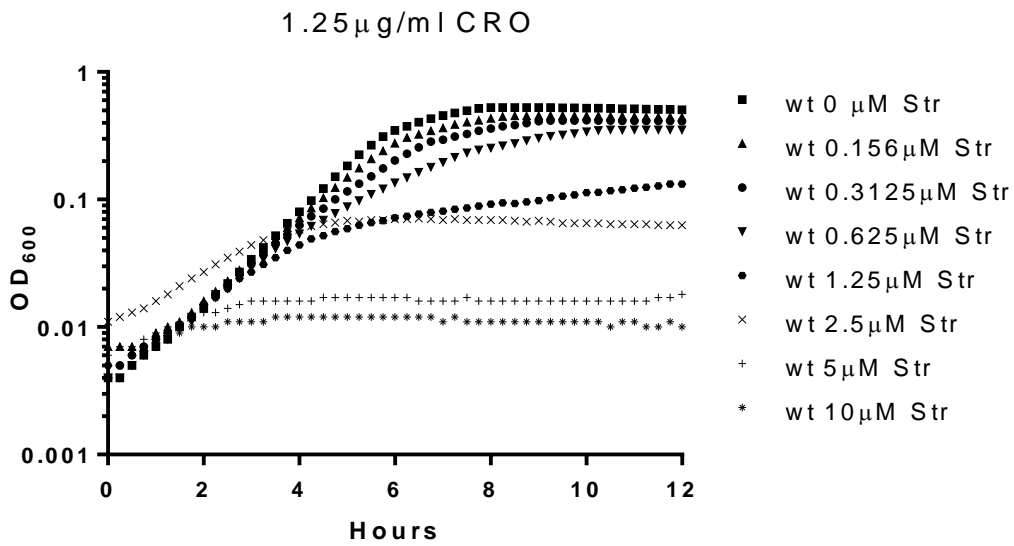

**Figure S3 – Staurosporine inhibits growth in a dose dependent manner –**

Overnight cultures of wild type *L. monocytogenes* were back diluted and treated with 2-fold serial dilutions Staurosporine in the presence of 1.25  $\mu$ g/ml ceftriaxone. Growth was analyzed for 12 hours at 15 minute intervals. Data are representative of at least 3 independent repeats.
